# Supplementary material
Source: publisher figshare collection journal article supplement (https://frontiersin.figshare.com/ndownloader/files/13084205)
Supplement: Supplementary file [file 13084205]

## *Supplementary Material*

### **Context-sensitivity and Individual Differences in the Derivation of Scalar Implicature**

Xiao Yang\*, Utako Minai, Robert Fiorentino

\* **Correspondence:** Xiao Yang: [xiaoyang@ku.edu](mailto:xiaoyang@ku.edu)

Supplementary Figure

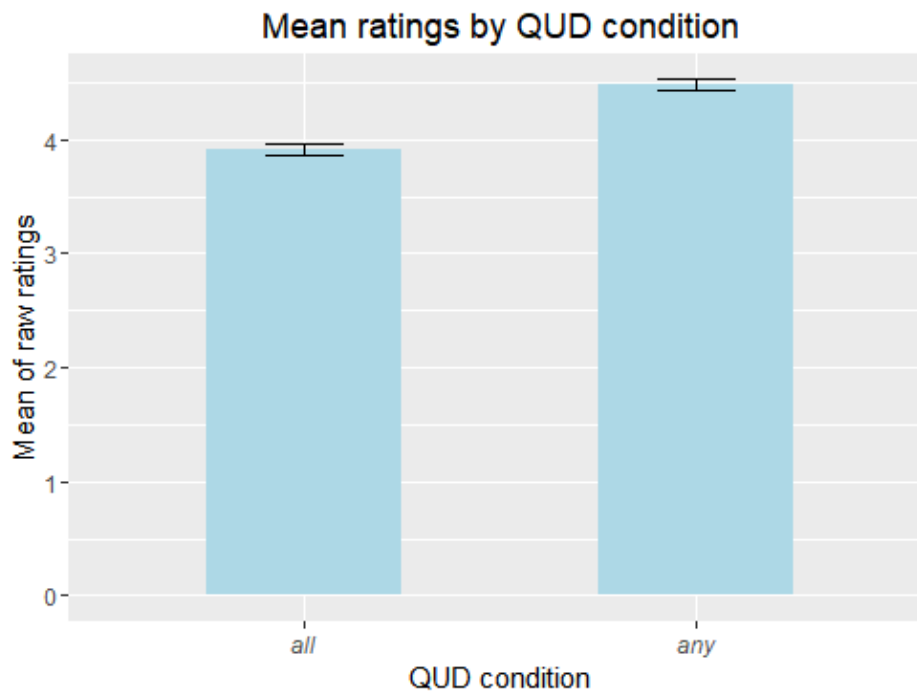

**Supplementary Figure 1.** Mean ratings in the *all* condition and in the *any* condition. Error bars illustrate Standard Error for each condition. For visualization purposes, the plot is based on raw ratings; the statistical analysis was performed on the odds ratio of increasing the ratings, as discussed in the Results of the manuscript.
